# Supplementary material for: Analytical description of adolescent binge drinking patients
Source: BMC Pediatr. 2023 Oct 16;23:512. doi: 10.1186/s12887-023-04325-2 (PMC10577939; doi:10.1186/s12887-023-04325-2)
Supplement: Supplementary file 1 — Supplementary Material 1 [file 12887_2023_4325_MOESM1_ESM.xlsx]

## Sheet: TableS1
Table S1: Overview of the study patients
Sample No.	Ethnicity	Sex	Age	Medical diagnosis	Drug intake / precription	Alcohol consumption Information from the patient	Drug consumption Information from the patient	GCS	BAC	LR group	EtG concentration in hair, pg/mL	Drug concentration blood, ng/mL	Further drugs detected in blood and/or hair screening	HTTLPR genotypes
1	Europe / Asia	female	13			5dl Vodka		15	1.6	-	0		paracetamol	L/L
2	Black	female	15			Beer, Vodka		14	1.79	-	0	THC-COOH 5.7	paracetamol	L/L
4	South America	female	14	Bulimia; Maltreatment		3.5dl Vodka		12	2.7	-	3		paracetamol	S/L
5	Europe	female	11			3.5dl Vodka		12	2	2	3			S/L
6	Europe	male	15			Vodka		15	1.86	1	x	THC-COOH 1.0	doxylamine, paracetamol	S/L
7	Europe	female	13	Depression		1/2 bottle Vodka		15	1.2	1	x			L/L
10	Europe	male	14	ADHS	Ritalin/Concerta	3-4dl Champagne	Part of Joint (Cannabis)	14	0.954	1	16	methylphenidate 2.0 / THC 0.3, HO-THC 0.2, THC-COOH 1.9		S/L
11	Europe	male	15			Whisky		9	1.8	3				L/L
14	Europe	male	15			Beer, Schnaps		6	2.35	1	6			L/L
15	Europe / South America	female	15	Mite allergy		NA	Part of Joint (Cannabis)	7	2.2	-	0		paracetamol	S/L
17	Asia	female	13	Depression	Deprivita	Kirsch		7	2.2	-	1		dextromethorphan, diphenhydramine, (pseudo)ephedrine, ondansetron	S/L
23	Europe	female	15			Vodka, Jägermeister		15	1.8	1				L/L
24	Europe / Asia	female	15			Vodka, Jägermeister		15	1.3	-				S/L
25	Europe	male	13			2dl Vodka	1 Joint (Marihuana, Phenylacydin)	15	1.6	1		THC 0.3, HO-THC 0.3, THC-COOH 3.2		L/L
27	Europe	male	15			3dl Vodka, 1 shot Schnaps		15	1.4	1				S/L
30	Europe	male	13			3-4dl Schnaps		15	2.2	-		methylphenidate 6.3		S/L
31	Europe	male	14			1/2 bottle Vodka		15	1.5	1	0		cocaine, MDMA, aripiprazol, paracetamol	S/L
32	Europe	male	14	Asthma		3dl Beer, Schnaps?	Cannabis	8	2.7	1	4	THC 0.3 HO-THC 0.2, THC-COOH 6.3	cocaine, ketamine, diphenhydramine, paracetamol	L/L
35	Europe	male	14	ADHS	Ritalin	3 Beer, 1 bottle Gin		15	2.6	2		methylphenidate 0.6		S/L
36	Europe	female	15	Depression	Antidepressiva, Sedativum	6dl Beer, 3-5dl Vodka		11	1.6	-		fluoxetine 150, norfluoxetine 95 / quetiapine traces	ondansetrone	S/S
37	Europe	male	14	Iron deficiency		1 bottle Vodka-Redbull		13	1.7	1		lorazepam 6.6		S/L
38	Europe / Asia	male	15			1 bottle Vodka-Redbull		15	NA	-				S/L
39	Europe	female	15	mild obsessive-compulsive disorder		4dl Schnaps		15	1.6	1				L/L
41	Black / Europe	male	15			Beer, Schnaps	3 Joints (Cannabis)	12	1.2	-		THC 0.5, HO-THC 0.6, THC-COOH 26		S/L
42	Europe	female	14			Beer, Schnaps	Part of Joint (Cannabis)	15	1.3	1			cetirizine	L/L
45	Europe	female	15			4 Whisky-Cola	Part of Joint (Cannabis)	13	1.3	1		THC-COOH 3.3	metamizol, ondansetron, paracetamol	L/L
48	Europe	male	15			Jägermeister, Vodka, other		13	3.2	2				S/L
50	Europe	male	15			5dl Vodka		13	1.7	1				L/L
51	Europe	male	14	in psychiatric care		6dl Beer, in addition other		7	1.6	3				L/L
52	Europe / Africa	female	15			1 bottle Vodka	Part of Joint (Cannabis)	15	1.1	-				L/L
53	Europe	male	15			Schnaps	Part of Joint (Cannabis)	14	1.1	1				S/L
55	Europe	female	14			5dl Schnaps		15	1.5	1				L/L
56	Europe	male	14			Gin		13	1.7	1		codeine 0.4		S/L
57	Europe	male	15			3dl Tequilla		14	1.8	1			ondansetron	S/L
59	Europe	female	13			5dl Vodka	Liquid Ecstasy	14	2.7	2		THC-COOH 6.7	metoclopramide	S/L
65	Europe	female	14			NA		15	1.3	1		THC 0.3, HO-THC 0.2, THC-COOH 4.6		L/L
69	Black	male	15			9dl Beer, 5dl Schnaps		14	0.9	-				S/L
70	Europe	female	15			Baileys, Schnaps		15	0.9	1			paracetamol	S/L
71	Asia	male	14	Asthma	Symbicort	7dl Wine, in addition liqueur		11	2.2	-		THC-COOH 5.4		S/S
73	Europe	male	15			2dl Jägermeister		10	1.7	3				S/L
74	Asia	male	15			2dl Jägermeister		12	1.1	-				S/S
75	Europe	female	14			9 shots (Tequilla, Vodka, Gin)		15	1.6	1				S/S
76	Asia	female	14			Beer, Vodka, Smirnnoff		11	1.5	-				L/L
81	Europe	male	15	ADHS	Evanse	Vodka		14	1.8	-		amphetamine 51		L/L
83	Europe	female	15			1/2 bottle Whisky		14	2	2		THC-COOH 1.4		S/L
85	Europe	female	15			2dl Vodka		15	0.5	1				S/L
88	Europe	male	14	Diabetes melitus		1.5 dl Vodka		14	1.3	1				S/L
90	Europe	male	14			4 shots Vodka		14	1.1	1				S/L
91	Europe	female	15			2dl Vodka-Energydrink		7	3	1				L/L
93	Black	male	13			NA		14	1.1	-				L/L
94	Europe / Asia	male	15			NA		13	1.2	-		THC-COOH 3.0		S/L
95	Europe	female	15			5dl Vodka, Jägermeister		15	1.7	-		fentanyl 0.4	ibuprofen	L/L
98	Europe	female	14			shots, Vodka Cola		10	1.6	3				S/L
104	North Africa	male	15	ADHS	Ritalin	5dl Beer, 7.5dl Wine		15	1.5	-		methylphenidate 0.9		L/L
110	Europe	male	15	ADHS		Jägermeister, Beer		14	1.6	1				S/L
112	Europe / Asia	female	15	Celiac disease		NA		15	1.1	-				S/L
114	Europe	male	14			3-5dl Jägermeister		9	1.6	3				L/L
115	Europe	female	14			3-4dl Vodka, in addition Smirnoff ice		14	1.6	1				S/L
116	Black	male	15			Whisky, Beer		11	2	-				S/L
118	Black	male	15			NA		10	1.5	-		THC-COOH 2.0		S/L
126	Europe	male	15			1l Beer, 1dl Vodka		13	1.6	1				S/L
127	Europe	female	15			1l Beer		15	0.08	-		midazolam 7.9		S/L
128	Europe	male	14			3dl Jägermeister		14	0.8	1		THC-COOH 1.4		S/S
131	Europe	female	14			2-3 dl Vodka-Cola		14	1.5	1				S/S
134	Black	male	15			Jägermeister, Beer		14	2.3	-				L/XL
139	Europe	male	16			Smirnoff ice, other		15	2.3	2				S/L
140	North Africa	female	14			Schnaps	1 Joint (Cannabis)	12	1.7	-		CBD 0.2		S/L
141	Europe	female	15			Eve, Somersby, Vodka		15	1.3	1			ondansetrone	S/L
145	Europe	female	14			1/2 bottle Vodka		9	1.6	3				L/L
147	Europe	female	14			2 dl Vodka-Sprite		14	1	1				S/L
149	Europe	female	14	Boderline disorder		1/2 bottle Wine	Cannabis	15	0.7	1				S/L
202	Europe	female	12			3dl Beer, 3dl Wine, Prosecco		15	1.8	1	7	CBD 0.4	amphetamine, ondansetron, paracetamol	S/S
	21 non-Europeans
	5 individuals with co-ingestion of substances in the effective range, incl. emergency medication
	GCS ≤ score 10
	BAC ≥ 2‰
	x = not enough hair available
	NA = not available
